# Supplementary material for: MiR-486-5p Targets CD133+ Lung Cancer Stem Cells through the p85/AKT Pathway
Source: MDPI journal article supplement (doi:10.3390/ph15030297), 2022-02-28
Supplement: s1 [file s1]

## Supplementary Figure Legend

**Suppl. Figure S1:** Effects of transfection in lung cancer cell lines. MiR-486-5p levels in lung cancer cell lines transiently **(A)** and stably **(B)** transfected with miRNA mimimc (mim-486). miR-486-5p relative expression was measured by the  $-\Delta\Delta C_t$  method using RNU48 as housekeeping RNA and cells transfected with the control vector (ctrl-v) as calibrator. Experiments were run in triplicates. **(C)** Effects of the transfection of the ctrl-v on the percentage of CD133+ cells evaluated by flow-cytometry. Five replicates were performed for each experiment.

**Suppl. Figure S2:** Transient transfection of hsa-miR-486-5p miRNA mimic (mim-486) and the control vector in lung cancer cell lines. **(A)** Transfected cells were plated in standard medium and counted with trypan blue at 72 and 120 hours. Apoptosis was measured by flow cytometry as annexin Vpos/7AADneg cells 48h after mimic transfection and represented as a fold increase compared to cell transfected with the control vector. Graphs show percentage of different Cell cycle phases after mim-486 transfection. Cell **(B)** migration and **(C)** invasion capability was assessed by transwell assay at 24h. All data are expressed as mean  $\pm$  standard error of the mean (SEM) of 5 biological replicates. Significant p-values  $<0.05$  are indicated by an asterisk. **(D)** Xenograft models of the 4 transfected lung cancer cell lines: 500,000 cells were inoculated into the flanks of SCID mice. Data are expressed as mean  $\pm$  standard error of the mean (SEM).

**Suppl. Figure S3** Endogenous levels of miR-486-5p, p85 and CD133+ cells in lung cancer cell lines. Graphs shows relative expression of miR-486, p85 and frequency of CD133+ cells in H460, LT73, A549 and H1299 (n=3 for each cell lines). Data are expressed as mean  $\pm$  standard error of the mean (SEM).

**Suppl. Figure S4:** Luciferase assay to evaluate the direct regulation of CD133 mRNA by miR-586-5p. Reporter systems were transfected in HEK293 with CD133 3'UTR containing vector in combination with the control vector (ctrl-v) and miR-486-5p mimic (mim-486). On the left the alignment of the miRNA seed sequence with the CD133 3'UTR predicted binding site. On the right Bar graphs showing average luciferase activity. Data are expressed as mean  $\pm$  standard error of the mean (SEM).

**Suppl. Figure S5:** Evaluation of miR-486-5p distribution in mice organs. **(A)** Schematic representation of CCL-486 schedule of administration. **(B)** Quantification of miR-486-5p positive cells percentage in CCL-486 treated PDX111, at the end of the experiment. Av. = mean  $\pm$  standard error of the mean (SEM) of all ten tumors. **(C)** DigitalPCR analysis of miR-486 levels in tumor, liver, lung, and spleen of untreated, control vector and CCL-486 treated PDX111. Data are expressed as mean  $\pm$  standard error of the mean (SEM). **(D)** Ratio between main organs and mouse weight in non-treated (N.T), control and CCL-486 treated PDX111. Data are expressed as mean  $\pm$  standard error of the mean (SEM).

**Supplementary Table S1:** miR-486-5p predicted target by miRWalk considering already validated targets included in miRTarBase and predicted also by TargetScan and miRDB databases.

| Gene symbol | Binding probability | Energy | Accessibility | Number of pairings | Binding region length | Longest consecutive pairings | position | miRTarBase ID |
|-------------|---------------------|--------|---------------|--------------------|-----------------------|------------------------------|----------|---------------|
| PIK3R1      | 1                   | -23    | 0.011788      | 14                 | 17                    | 11                           | 3UTR     | MIRT735338    |
| PIK3R1      | 1                   | -21.8  | 0.000674      | 15                 | 19                    | 7                            | CDS      | MIRT735338    |
| CADM1       | 1                   | -21.4  | 3.18E-06      | 13                 | 14                    | 13                           | 3UTR     | MIRT438847    |
| FBN1        | 1                   | -26.6  | 0.000833      | 16                 | 19                    | 8                            | CDS      | MIRT731367    |
| HAT1        | 1                   | -20.5  | 7.35E-06      | 12                 | 14                    | 8                            | 3UTR     | MIRT735253    |
| SMAD2       | 0.969231            | -25.7  | 5.23E-05      | 18                 | 23                    | 7                            | 3UTR     | MIRT732557    |
| ARHGAP5     | 0.923077            | -20.7  | 0.009394      | 19                 | 24                    | 12                           | 3UTR     | MIRT053295    |
| CADM1       | 0.923077            | -24.1  | 0.000325      | 20                 | 30                    | 8                            | 3UTR     | MIRT438847    |
| CADM1       | 0.923077            | -21.4  | 3.18E-06      | 13                 | 14                    | 13                           | 3UTR     | MIRT438847    |
| CDK4        | 0.923077            | -22.6  | 2.22E-05      | 14                 | 19                    | 8                            | CDS      | MIRT731583    |
| SMAD2       | 0.923077            | -28.9  | 0.000217      | 18                 | 20                    | 16                           | 3UTR     | MIRT732557    |
| FOXO1       | 0.923077            | -23    | 1.58E-05      | 16                 | 22                    | 9                            | CDS      | MIRT734356    |
| HAT1        | 0.923077            | -20.5  | 7.35E-06      | 12                 | 15                    | 8                            | CDS      | MIRT735253    |
| HAT1        | 0.923077            | -22.5  | 0.00091       | 21                 | 31                    | 8                            | 5UTR     | MIRT735253    |
| PIK3R1      | 0.923077            | -23    | 0.011788      | 14                 | 17                    | 11                           | 3UTR     | MIRT735338    |
| PIK3R1      | 0.923077            | -22    | 0.000195      | 15                 | 19                    | 8                            | 3UTR     | MIRT735338    |
| ARHGAP5     | 0.846154            | -21.3  | 5.77E-06      | 13                 | 18                    | 9                            | CDS      | MIRT053295    |
| DOCK3       | 0.846154            | -25.8  | 3.66E-05      | 18                 | 25                    | 6                            | CDS      | MIRT438814    |
| CADM1       | 0.846154            | -21.6  | 9.01E-06      | 19                 | 28                    | 6                            | 3UTR     | MIRT438847    |
| FBN1        | 0.846154            | -31.6  | 0.002803      | 19                 | 26                    | 10                           | CDS      | MIRT731367    |
| SMAD2       | 0.846154            | -22.6  | 0.000862      | 20                 | 41                    | 8                            | 3UTR     | MIRT732557    |
| SMAD2       | 0.846154            | -22.1  | 0.001452      | 17                 | 30                    | 6                            | 5UTR     | MIRT732557    |
| SMAD2       | 0.846154            | -29.9  | 1.58E-06      | 16                 | 20                    | 10                           | 3UTR     | MIRT732557    |
| PTEN        | 0.846154            | -23.7  | 1.10E-07      | 21                 | 49                    | 13                           | 5UTR     | MIRT734357    |
| PIK3R1      | 0.846154            | -22    | 0.000195      | 15                 | 19                    | 8                            | 3UTR     | MIRT735338    |
| DOCK3       | 0.807692            | -22.3  | 0.008488      | 19                 | 30                    | 10                           | CDS      | MIRT438814    |

**Supplementary Table S2: Extreme Limiting Dilution Assay**

Mim-486 transfected A549 cells

| N. injected Cells | N. Injections | N. Grown tumors | Group |
|-------------------|---------------|-----------------|-------|
| 10000             | 12            | 10              | ctrl  |
| 10000             | 12            | 6               | 486   |
| 100000            | 12            | 12              | ctrl  |
| 100000            | 12            | 6               | 486   |
| 500000            | 12            | 12              | ctrl  |
| 500000            | 12            | 10              | 486   |

| Confidence intervals for<br>1/(stem cell frequency) |        |          |       |
|-----------------------------------------------------|--------|----------|-------|
| Group                                               | Lower  | Estimate | Upper |
| 486                                                 | 265554 | 148226   | 82736 |
| ctrl                                                | 11308  | 5582     | 2755  |

Overall test for differences in stem cell frequencies between any of the groups **P.value: 6.44e-12**
